# Supplementary material for: Prognostic Value of Inflammatory Burden Index in Advanced Gastric Cancer Patients Undergoing Multimodal Treatment
Source: MDPI journal article supplement (doi:10.3390/cancers16040828), 2024-02-18
Supplement: s1 [file s1]

**Supplementary Table S2.** Assessment of the Correlations Between Selected Demographic and Clinical Variables and IBI Values.

| Variable                               | IBI    |                    |
|----------------------------------------|--------|--------------------|
|                                        | $\rho$ | $p$                |
| Age [years]                            | 0.174  | 0.0948             |
| Lauren`s type                          | 0.149  | 0.1591             |
| (y)pT                                  | 0.141  | 0.1765             |
| (y)pN                                  | 0.150  | 0.1510             |
| Histopathological grading              | -0.009 | 0.9296             |
| No. of neoadjuvant chemotherapy cycles | -0.095 | 0.4145             |
| Tumour Regression Grade                | 0.117  | 0.3125             |
| CCI                                    | 0.065  | 0.5383             |
| ICU stay [days]                        | 0.216  | 0.4219             |
| LMR                                    | -0.475 | <b>&lt;0.0001*</b> |
| PLR                                    | 0.391  | <b>0.0001*</b>     |
| NLR                                    | 0.672  | <b>&lt;0.0001*</b> |

ypT – post-neoadjuvant pathological tumor stage, ypN - post-neoadjuvant pathological nodal stage, LMR – lymphocyte/monocyte ratio, PLR – platelet/lymphocyte ratio, NLR – neutrophil/lymphocyte ratio, IBI – inflammatory burden index, CCI – Comprehensive Complication Index, ICU – intensive care unit, LMR – lymphocyte/monocyte ratio, PLR – platelet/lymphocyte ratio, NLR – neutrophil/lymphocyte ratio
