# Supplementary material for: Prognostic Value of Inflammatory Burden Index in Advanced Gastric Cancer Patients Undergoing Multimodal Treatment
Source: MDPI journal article supplement (doi:10.3390/cancers16040828), 2024-02-18
Supplement: s1 [file s1]

**Supplementary Table S1.** Influence of Selected Demographic and Clinical Variables on the Risk of Postoperative Complications.

| Variable                         | Postoperative complications |            | Univariable <sup>#</sup> |          |
|----------------------------------|-----------------------------|------------|--------------------------|----------|
|                                  | No                          | Yes        | OR [95%CI]               | <i>p</i> |
| <b>Sex</b>                       |                             |            |                          |          |
| <u>Women</u>                     | 25 (75.8%)                  | 8 (24.2%)  | 1.34 [0.51-3.53]         | 0.554    |
| Men                              | 42 (70%)                    | 18 (30%)   |                          |          |
| <b>Age</b>                       |                             |            |                          |          |
| <u>&lt;75 years</u>              | 61 (73.5%)                  | 22 (26.5%) | 1.85 [0.48-7.17]         | 0.374    |
| ≥75 years                        | 6 (60%)                     | 4 (40%)    |                          |          |
| <b>Tumor localisation</b>        |                             |            |                          |          |
| <u>U, M</u>                      | 48 (73.8%)                  | 17 (26.2%) | 1.34 [0.51-3.52]         | 0.555    |
| L                                | 19 (67.9%)                  | 9 (32.1%)  |                          |          |
| <b>Lauren histological type</b>  |                             |            |                          |          |
| <u>Diffuse/Mixed</u>             | 34 (73.9%)                  | 12 (26.1%) | 1.15 [0.46-2.89]         | 0.764    |
| Intestinal                       | 32 (71.1%)                  | 13 (28.9%) |                          |          |
| <b>(y)pT</b>                     |                             |            |                          |          |
| <u>0-2</u>                       | 58 (74.4%)                  | 20 (25.6%) | 1.93 [0.61-6.11]         | 0.261    |
| 3-4                              | 9 (60%)                     | 6 (40%)    |                          |          |
| <b>(y)pN</b>                     |                             |            |                          |          |
| <u>N-</u>                        | 31 (77.5%)                  | 9 (22.5%)  | 1.57 [0.61-4.07]         | 0.348    |
| N+                               | 35 (68.6%)                  | 16 (31.4%) |                          |          |
| <b>Histopathological grading</b> |                             |            |                          |          |
| <u>G3</u>                        | 33 (71.7%)                  | 13 (28.3%) | 0.97 [0.39-2.40]         | 0.948    |
| G1-G2                            | 34 (72.3%)                  | 13 (27.7%) |                          |          |
| <b>Neoadjuvant chemotherapy</b>  |                             |            |                          |          |
| <u>No</u>                        | 9 (64.3%)                   | 5 (35.7%)  | 1.53 [0.46-5.10]         | 0.485    |

|                                |            |            |                  |                |
|--------------------------------|------------|------------|------------------|----------------|
| Yes                            | 58 (73.4%) | 21 (26.6%) |                  |                |
| <b>Tumour Regression Grade</b> |            |            |                  |                |
| <u>3, 4</u>                    | 45 (73.8%) | 16 (26.2%) | 0.94 [0.26-3.33] | 0.920          |
| 1, 2                           | 12 (75%)   | 4 (25%)    |                  |                |
| <b>Type of gastrectomy</b>     |            |            |                  |                |
| <u>Proximal, Distal</u>        | 39 (72.2%) | 15 (27.8%) | 1.02 [0.41-2.56] | 0.963          |
| Total                          | 28 (71.8%) | 11 (28.2%) |                  |                |
| <b>LMR</b>                     |            |            |                  |                |
| <u>Low</u>                     | 33 (71.7%) | 13 (28.3%) | 0.97 [0.39-2.40] | 0.9485         |
| High                           | 34 (72.3%) | 13 (27.7%) |                  |                |
| <b>PLR</b>                     |            |            |                  |                |
| <u>Low</u>                     | 34 (73.9%) | 12 (26.1%) | 1.20 [0.48-2.98] | 0.6911         |
| High                           | 33 (70.2%) | 14 (29.8%) |                  |                |
| <b>NLR</b>                     |            |            |                  |                |
| <u>Low</u>                     | 36 (78.3%) | 10 (21.7%) | 1.86 [0.74-4.68] | 0.189          |
| High                           | 31 (66%)   | 16 (34%)   |                  |                |
| <b>IBI</b>                     |            |            |                  |                |
| <u>Low</u>                     | 38 (82.6%) | 8 (17.4%)  | 2.95 [1.13-7.72] | <b>0.0277*</b> |
| High                           | 29 (61.7%) | 18 (38.3%) |                  |                |

U – upper, M – median, L – lower, ypT – post-neoadjuvant pathological tumor stage, ypN - post-neoadjuvant pathological nodal stage, LMR – lymphocyte/monocyte ratio, PLR – platelet/lymphocyte ratio, NLR – neutrophil/lymphocyte ratio, IBI – inflammatory burden index
